# Supplementary material for: Controlling for cellular heterogeneity using single-cell deconvolution of gene expression reveals novel markers of colorectal tumors exhibiting microsatellite instability
Source: PubMed Central journal article supplement (PMC8057268; doi:10.18632/oncotarget.27935), 2021-04-13
Supplement: oncotarget-12-767-s001.pdf [file oncotarget-12-767-s001.pdf]

## Controlling for cellular heterogeneity using single-cell deconvolution of gene expression reveals novel markers of colorectal tumors exhibiting microsatellite instability

### SUPPLEMENTARY MATERIALS

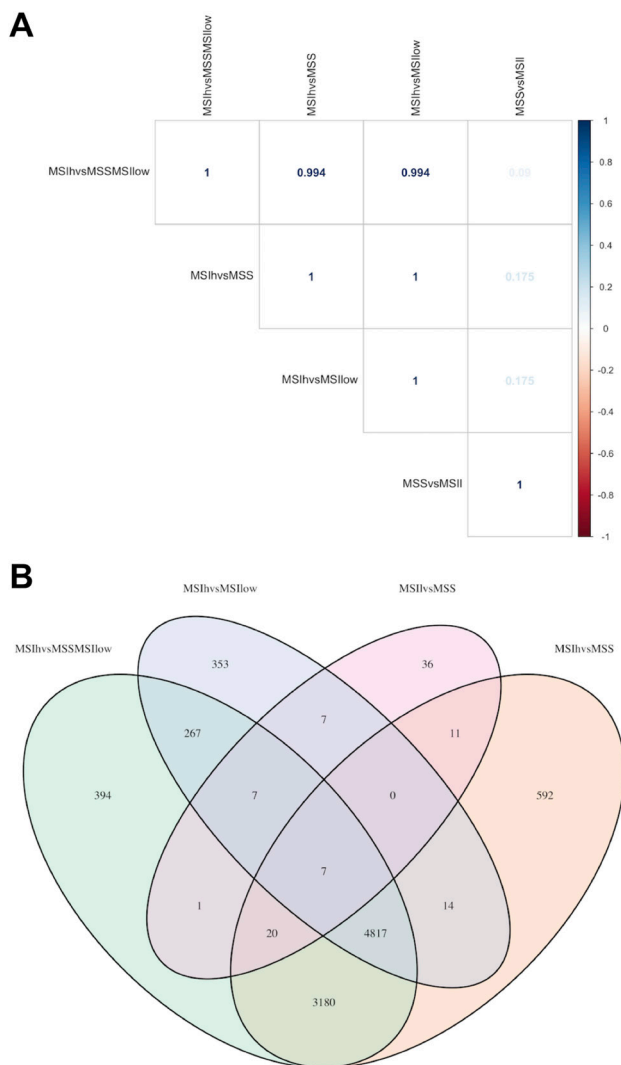

**Supplementary Figure 1: Determination of TCGA-COAD comparisons.** (A) Test-statistics for each regression were correlated to determine the similarity of global transcriptomic response between analyses. (B) Significant DEGs ( $q = 0.05$ ) identified in each regression were overlaid using a Venn diagram to determine the extent of overlap.

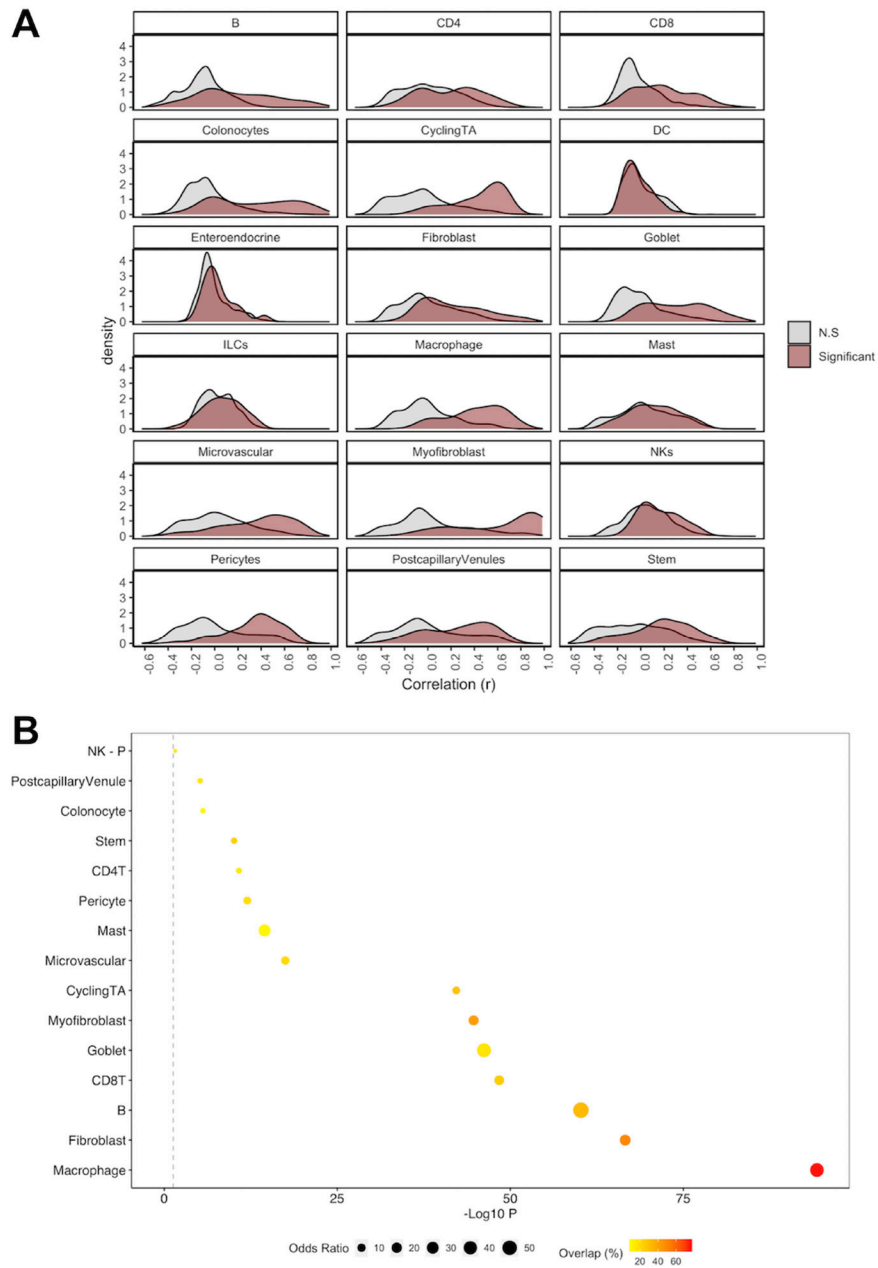

**Supplementary Figure 2: Single-cell deconvolution of GSE146889 CRC tumors.** (A) Cell scores were correlated to markers of cell types. Correlations between cell scores and significant markers of that cell type are shown in red. For background, correlations between a cell score and markers of other cell types were displayed in grey. (B) Summary of enrichment analysis (one-way Fisher's exact test) for cell type markers in differential expression analysis of cell scores. Grey line represents  $\log_{10}(0.05)$ . Percentage overlap reflects percentage of cell type markers for a given cell type that were significant within regression of cell score. For NK cells, enrichment was only identified using nominally significant DEGs ( $P = 0.05$ ).

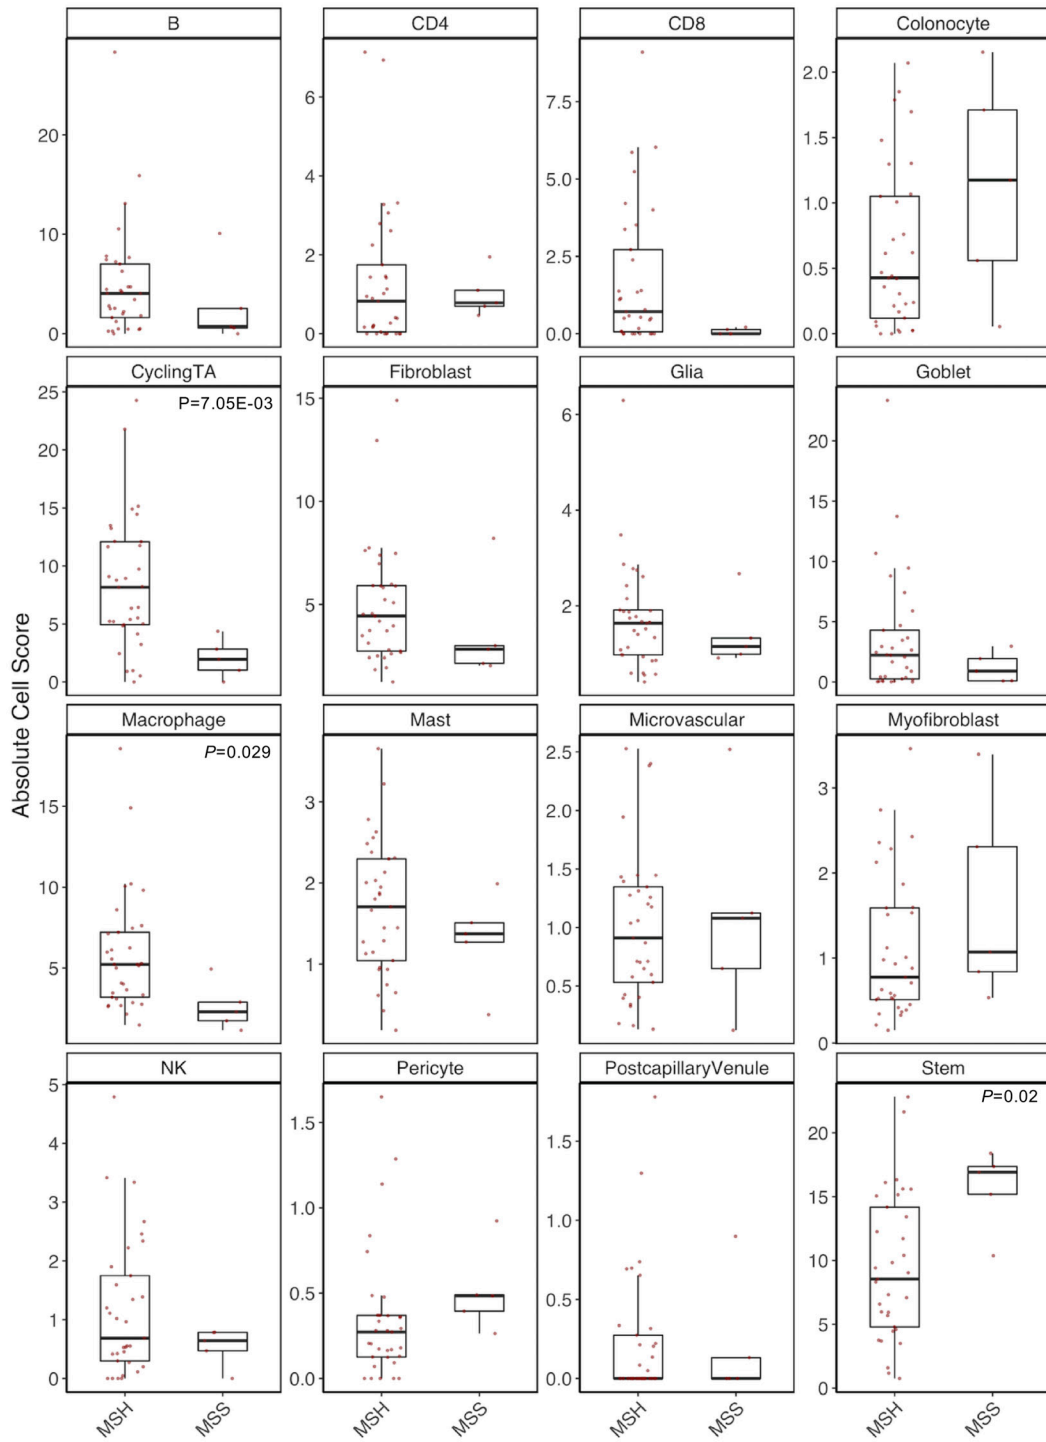

**Supplementary Figure 3: Summary of cell score regressions on MSI status in GSE146889 CRC tumor dataset.**

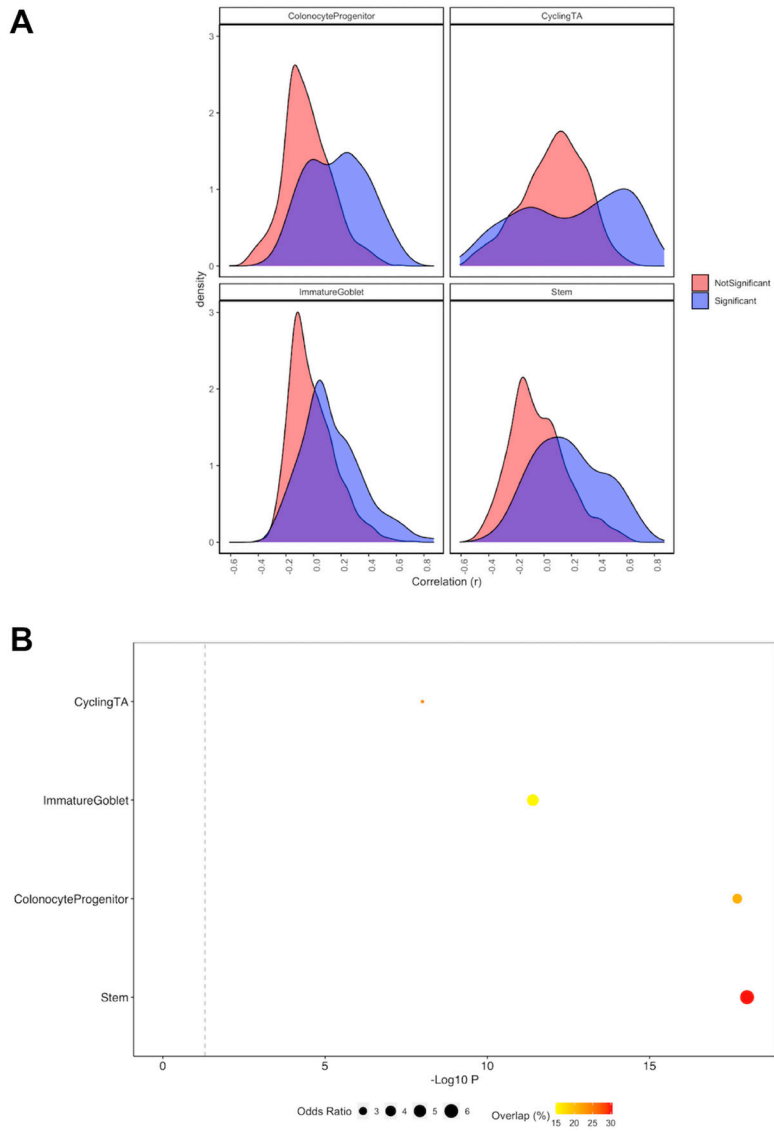

**Supplementary Figure 4: Single-cell deconvolution of CCLE colon cancer cell lines.** (A) Cell scores were correlated to markers of cell types. Correlations between cell scores and significant markers of that cell type are shown in blue. For background, correlations between a cell score and markers of other cell types were displayed in red. (B) Summary of enrichment analysis (one-way Fisher's exact test) for cell type markers in differential expression analysis of cell scores. Grey line represents  $\log_{10}(0.05)$ . Percentage overlap reflects percentage of cell type markers for a given cell type that were significant within regression of cell score.

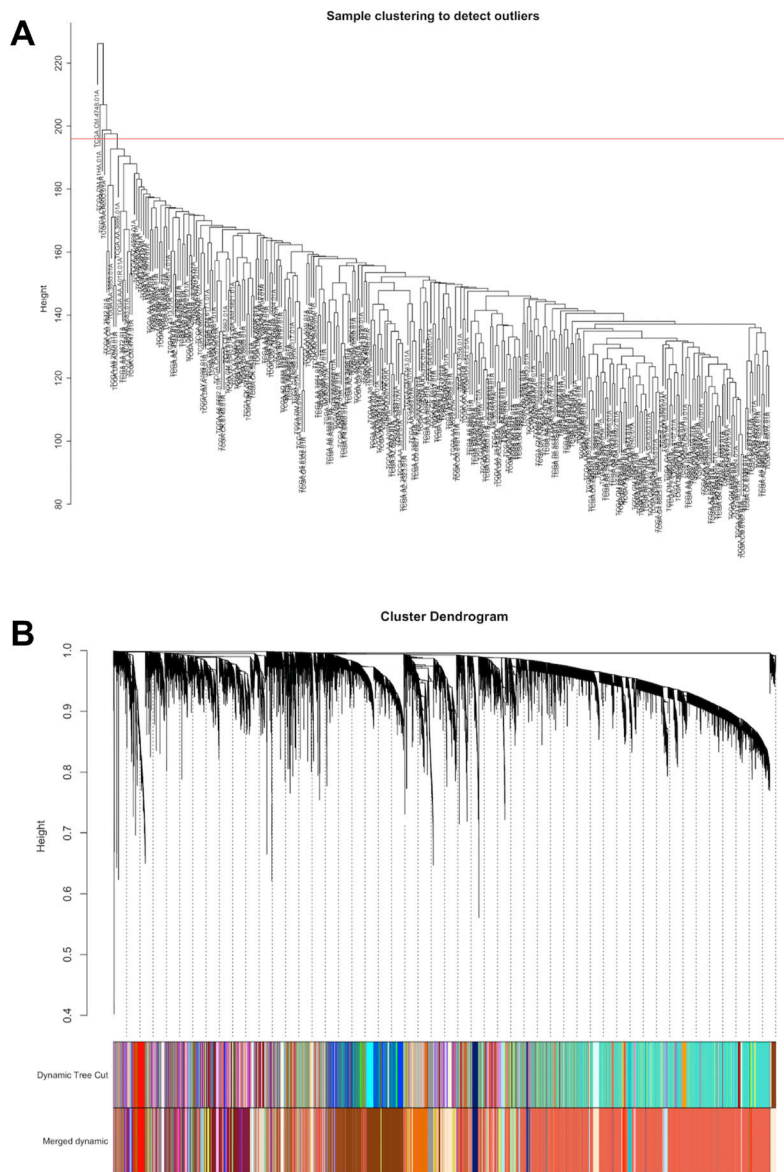

**Supplementary Figure 5: Overview of WGCNA performed in TCGA-COAD dataset.** (A) Hierarchical clustering identified four samples as potential outliers based on their dissimilarity to other samples. These four samples were removed. (B) Adjacency matrix was raised to the power of 4 and transformed into a topological overlap matrix. Hierarchical clustering was performed on this matrix. Genes with high levels of co-expression are grouped. Module colors were assigned (dynamic tree cut) and modules that are highly co-expressed ( $r = 0.7$ ) were merged (merged dynamic). These merged modules were used for downstream association testing.

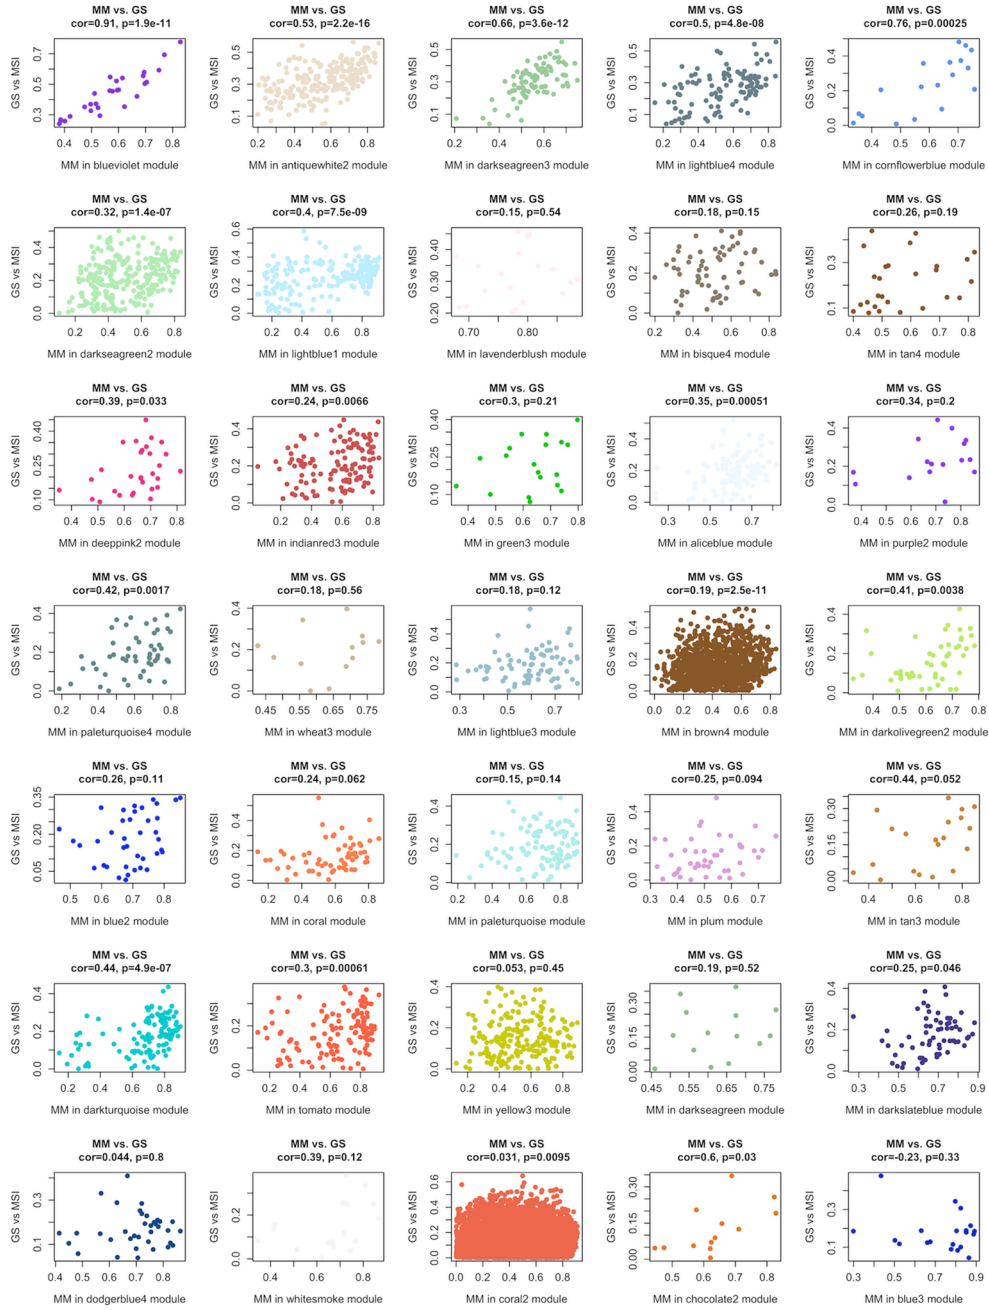

**Supplementary Figure 6: Summary of correlation results between gene significance and module membership for each of the 35 modules significantly associated with MSI status ( $q = 0.05$ ).**

**Supplementary Table 1: Overlap of cell type markers with DEGs identified in MSI-H vs MSS/MSI-L analysis of TCGA-COAD cohort**

| Cell Type             | No. DEGs overexpressed in MSI-H | No. DEGs underexpressed in MSI-H |
|-----------------------|---------------------------------|----------------------------------|
| B cell                | 37 [3]                          | 16 [4]                           |
| CD4T                  | 42 [4]                          | 7 [0]                            |
| CD8T                  | 60 [1]                          | 3 [1]                            |
| Colonocyte            | 45 [2]                          | 101 [6]                          |
| CyclingTA             | 91 [9]                          | 28 [4]                           |
| DC                    | 59 [4]                          | 13 [1]                           |
| Enteroendocrine       | 16 [1]                          | 17 [2]                           |
| Fibroblast            | 49 [3]                          | 107 [10]                         |
| Glia                  | NA <sup>+</sup>                 | NA                               |
| Goblet                | 52 [6]                          | 29 [2]                           |
| ILCs                  | 18 [1]                          | 13 [2]                           |
| Macrophages           | 80 [2]                          | 9 [1]                            |
| Mast                  | 29 [6]                          | 17 [1]                           |
| Microvascular         | 22 [3]                          | 13 [7]                           |
| Myofibroblasts        | 10 [2]                          | 20 [1]                           |
| NKs                   | 16 [0]                          | 1 [0]                            |
| Pericytes             | 8 [0]                           | 26 [1]                           |
| Postcapillary Venules | 18 [3]                          | 15 [1]                           |
| Stem                  | 9 [7]                           | 41 [2]                           |

Values without brackets represent FDR corrected DEGs ( $q = 0.05$ ). Values in brackets represent the number of additional DEGs that were nominally significant ( $P = 0.05$ ) that did not reach FDR correction. <sup>+</sup>Cell markers not available.

**Supplementary Table 2: Correlation of cell-type expression markers to cell scores generated in each approach.** See Supplementary Table 2

**Supplementary Table 3: Cell type agnostic DEGs found to be significant ( $q = 0.05$ ) in regression analysis of MSI status in TCGA-COAD data that were replicated in similar analysis of CCLE ( $P = 0.05$ ).** See Supplementary Table 3

**Supplementary Table 4: Overview of modules identified in WGCNA.** See Supplementary Table 4

**Supplementary Table 5: Novel significant DEGs ( $q = 0.05$ ) identified in TCGA-COAD regression of MSI-H vs MSS/MSI-L tumors following adjustment for cell composition that were replicated in a similar analysis of colon cancer cell lines ( $P = 0.05$ ).** See Supplementary Table 5
